# Supplementary material for: The Characterization of a Novel Virus Discovered in the Yeast Pichia membranifaciens
Source: MDPI journal article supplement (doi:10.3390/v14030594), 2022-03-13
Supplement: s1 [file s1]

| <b>Virus/yeast</b>                               | <b>Abbreviation</b> | <b>Accession Number</b> |
|--------------------------------------------------|---------------------|-------------------------|
| Saccharomyces cerevisiae virus L-BC              | ScV-L-BC            | NC_001641.1             |
| <i>Scheffersomyces stipitis</i> CBS6054          | Ss CBS6054          | NC_009045.1             |
| Tuber aestivum virus 1                           | TAV-1               | NC_038698.1             |
| Torulaspora delbrueckii virus LA                 | TdV-L-A             | MW174763.1              |
| Saccharomyces cerevisiae virus L-A               | ScV-L-A             | NC_003745.1             |
| Saccharomyces cerevisiae virus L-A-lus           | ScV-L-Alus          | JN819511.1              |
| Saccharomyces paradoxus virus L-A-45             | SpV-L-A45           | KY489963.1              |
| Saccharomyces kudriavzevii virus L-A1            | SkV-L-A1            | NC_032106.1             |
| Saccharomyces paradoxus virus L-A-62             | SpV-L-A62           | KY489968.1              |
| Saccharomyces paradoxus virus L-A-74             | SpV-L-A74           | KY489964.1              |
| Saccharomyces uvarum virus L-A-10560             | SuV-L-A10560        | KY489969.1              |
| Saccharomyces cerevisiae virus L-A-28            | ScV-L-A28           | KU845301.2              |
| Saccharomyces paradoxus virus L-A-21             | SpV-L-A21           | KY489962.1              |
| Red clover powdery mildew-associated totivirus 1 | RPaTV1              | NC_028480.1             |
| Red clover powdery mildew-associated totivirus 4 | RPaTV4              | LC075489.1              |
| Red clover powdery mildew-associated totivirus 6 | RPaTV6              | NC_028486.1             |
| Red clover powdery mildew-associated totivirus 7 | RPaTV7              | NC_028488.1             |
| Maize associated totivirus                       | MATV                | MN428832.1              |
| Puccinia striiformis totivirus 5                 | PsTV-5              | KY207365.1              |
| Maize-associated totivirus 3                     | MATV3               | NC_036589.1             |
| Black raspberry virus F                          | BRVF                | NC_009890.1             |
| Peach-associated virus 2                         | PAV2                | MN905505.1              |
| Taro-associated totivirus L                      | TATL                | MN119621.1              |
| Panax notoginseng virus B                        | PnV-A               | NC_040551.1             |
| Ambrosiozyma totivirus A                         | AkV-A               | MK231133.1              |
| Scheffersomyces segobiensis virus L              | SsV-L               | NC_038697.1             |
| Malassezia restricta virus                       | MrV40L              | MN603497.1              |
| Erysiphe necator associated totivirus 5          | EnaTV5              | MN617026.1              |
| Xanthophyllomyces dendrorhous virus L1b          | XdV-L1b             | NC_038699.1             |
| Puccinia striiformis totivirus 1                 | PsTV1               | KY207361.1              |
| Erysiphales associated totivirus 7               | EaTV7               | MN628278.1              |
