# Supplementary material for: The Characterization of a Novel Virus Discovered in the Yeast Pichia membranifaciens
Source: MDPI journal article supplement (doi:10.3390/v14030594), 2022-03-13
Supplement: s1 [file s1]

| Model           | Molprobability<br>score | clashscore | Ramachandran<br>favored | Ramachandran<br>outliers | Rotamer<br>outliers |
|-----------------|-------------------------|------------|-------------------------|--------------------------|---------------------|
| PmV Gag         | 1.02                    | 0          | 95%                     | 3                        | 9                   |
| PmV Pol         | 1.25                    | 0.15       | 92.18%                  | 7                        | 13                  |
| ScV-L-A Pol     | 1.37                    | 0.15       | 92.06%                  | 5                        | 19                  |
| TdV-LABarr1 Pol | 1.38                    | 0.82       | 90.20%                  | 8                        | 9                   |
| TAV1 Pol        | 1.24                    | 0.22       | 92.89                   | 6                        | 13                  |
